# Supplementary material for: Digital Gene Expression Analysis Based on Integrated De Novo Transcriptome Assembly of Sweet Potato [Ipomoea batatas (L.) Lam.]
Source: PLoS One. 2012 Apr 27;7(4):e36234. doi: 10.1371/journal.pone.0036234 (PMC3338685; doi:10.1371/journal.pone.0036234)
Supplement: Table S1 — Statistics of CAP3 reassembly output of sweet potato transcriptome. (XLS) [file pone.0036234.s005.xls]

## Sheet: Sheet1
Table S1. Statistics of CAP3 reassembly output of sweet potato transcriptome.
Input sequences	Parameters		Output sequences	No. of sequences			N50 (bp)		Average length (bp)		Total length (Mbp)		Maximal length (bp)
	-o	-p		>=75 bp	>=100 bp	>=500 bp	>=75 bp	>=100 bp	>=75 bp	>=100 bp	>=75 bp	>=100 bp
19 contig sets	40	95	contigs (4095c)	168736	130903	20530	392	435	263.48	314.83	44.46	41.21	5338
			singletons (4095s)	1181715	764841	4609	126	145	129.48	152.47	153.01	116.61	1820
19 contig sets	40	90	contigs	133859	105947	20276	471	517	293.71	348.33	39.32	36.9	5338
			singletons	1049851	686512	3839	126	144	129.39	151.47	135.84	103.99	1820
19 contig sets	25	90	contigs	133863	105947	20276	471	517	293.7	348.33	39.32	36.9	5338
			singletons	1049867	686525	3839	126	144	129.39	151.47	135.84	103.99	1820
19 contig sets	25	92	contigs	168753	130911	20530	392	435	263.46	314.82	44.46	41.21	5338
			singletons	1181725	764848	4609	126	145	129.48	152.47	153.02	116.61	1820
4095s	30	92	contigs (3092c)	139148	113914	2973	184	200	172.92	191.41	24.06	21.8	1972
			singletons (3092s)	148323	86559	135	124	143	119.88	147.53	17.78	12.77	1202
4095c+3092c+3092s	25	90	contigs	68227	65342	20086	728	735	460.04	476.34	31.39	31.13	5466
			singletons	128486	62711	760	118	149	120.23	159.51	15.45	10	2797
CAP3 parameters of “-o” and “-p” means overlap length cutoff and overlap percent identity cutoff, respectively. First, 19 contig sets were assembled with parameters “-o 40” and “-p 95”; second, the singletons of the first assembly (4095s) were assembly with parameters “-o 30” and “-p 92”; third, the contigs of the first and second assemblies (4095c and 3092c) and the singletons of the second asse…
