# Supplementary material for: Digital Gene Expression Analysis Based on Integrated De Novo Transcriptome Assembly of Sweet Potato [Ipomoea batatas (L.) Lam.]
Source: PLoS One. 2012 Apr 27;7(4):e36234. doi: 10.1371/journal.pone.0036234 (PMC3338685; doi:10.1371/journal.pone.0036234)
Supplement: Table S4 — Codon usage of sweet potato. (XLS) [file pone.0036234.s008.xls]

## Sheet: Sheet1
Table S4. Codon usage of sweet potato.
Codon	Amino Acid	Fraction
GCA	A	0.346
GCC	A	0.167
GCG	A	0.075
GCT	A	0.411
TGC	C	0.469
TGT	C	0.531
GAC	D	0.292
GAT	D	0.708
GAA	E	0.535
GAG	E	0.465
TTC	F	0.417
TTT	F	0.583
GGA	G	0.320
GGC	G	0.173
GGG	G	0.219
GGT	G	0.288
CAC	H	0.360
CAT	H	0.640
ATA	I	0.266
ATC	I	0.247
ATT	I	0.487
AAA	K	0.471
AAG	K	0.529
CTA	L	0.105
CTC	L	0.127
CTG	L	0.149
CTT	L	0.248
TTA	L	0.126
TTG	L	0.245
ATG	M	1.000
AAC	N	0.373
AAT	N	0.627
CCA	P	0.357
CCC	P	0.168
CCG	P	0.095
CCT	P	0.379
CAA	Q	0.519
CAG	Q	0.481
AGA	R	0.314
AGG	R	0.274
CGA	R	0.110
CGC	R	0.087
CGG	R	0.093
CGT	R	0.123
AGC	S	0.135
AGT	S	0.180
TCA	S	0.230
TCC	S	0.125
TCG	S	0.066
TCT	S	0.264
ACA	T	0.349
ACC	T	0.192
ACG	T	0.090
ACT	T	0.370
GTA	V	0.165
GTC	V	0.155
GTG	V	0.271
GTT	V	0.409
TGG	W	1.000
TAC	Y	0.387
TAT	Y	0.613
TAA	*	0.267
TAG	*	0.176
TGA	*	0.556
12,740 ORFs were used for codon usage bias analysis.
