# Supplementary material for: Digital Gene Expression Analysis Based on Integrated De Novo Transcriptome Assembly of Sweet Potato [Ipomoea batatas (L.) Lam.]
Source: PLoS One. 2012 Apr 27;7(4):e36234. doi: 10.1371/journal.pone.0036234 (PMC3338685; doi:10.1371/journal.pone.0036234)
Supplement: Table S5 — Comparison of two assembly strategies on de novo assembly of sweet potato transcriptome. (XLS) [file pone.0036234.s009.xls]

## Sheet: Sheet1
Table S5. Comparison of two assembly strategies on de novo assembly of sweet potato transcriptome.
Assembly	Basic length statistics							ORF prediction			% mapped reads	% shared transcripts	% no BLASTX hit	Accuracy	Sensitivity
	>200 bp	>500 bp	>1,000 bp	N50 (bp)	Average length (bp)	Total length (Mbp)	Maximal length (bp)	≥300	≥900	≥1500
FA	55181	20788	7650	741	569.38	31.42	5466	25771/37179 (69%)	5091/9243 (55%)	1695/2971 (57%)	60.58	95.54	32.54	0.72	0.85
T75	67610	23502	7819	666	534.22	36.12	4303	28657/43989 (65%)	4966/9576 (52%)	1260/2856 (44%)	57.96	94.45	31.08	0.73	0.79
FA is the final assembly of combined strategy; T75 was assembled by Trinity; transcripts with length longer than 200 bp were calculated; ORFs were predicted by using EMBOSS; reads were mapped back to transcripts by using Bowtie; the shared transcripts were caculated by using BLAT; Accuracy and Sensitivity were caculated as described in Materials and Methods.
